# Supplementary material
Source: PubMed Central journal article supplement (PMC4934063)
Supplement: kccy-15-12-1183846-s001.pdf [file kccy-15-12-1183846-s001.pdf]

Barbosa et al (2016) The ceramide-activated protein phosphatase Sit4p controls lifespan, mitochondrial function and cell cycle progression by regulating hexokinase 2 phosphorylation. *Cell Cycle*

**Supplemental Table S1.** Identification of proteins differentially expressed in *sit4Δ* cells by MALDI-MS/MS.

Proteins were isolated from *S. cerevisiae* BY4741 and *sit4Δ* cells grown to exponential phase in YPD medium and separated by two-dimensional electrophoresis. Proteins were visualized by silver staining. Gel was scanned using a densitometer, images were converted to TIFF format and PDQuest v7.3 software was used for quantification of spot intensities. Proteins were identified by MALDI-TOF/TOF.

| Gel spot                      | Accession no. | Protein name | Protein Function                                            | MW    | pI  | Fold Change | S.D. |
|-------------------------------|---------------|--------------|-------------------------------------------------------------|-------|-----|-------------|------|
| <b>Proteins downregulated</b> |               |              |                                                             |       |     |             |      |
| 1                             | gi 6320846    | Ntf2p        | Nuclear Transport Factor 2                                  | 14444 | 4.5 | 0,19        | 0,18 |
| 2                             | gi 6323138    | Ahp1p        | Thiol-specific peroxiredoxin                                | 19274 | 5.0 | 0,20        | 0,12 |
| 3                             | gi 6322794    | Tma19p       | Protein that associates with ribosomes                      | 18786 | 4.4 | 0,36        | 0,09 |
| 4                             | gi 6319315    | Efb1p        | Translation elongation factor 1 beta                        | 22670 | 4.3 | 0,53        | 0,03 |
| 5                             | gi 6323138    | Ahp1p        | Thiol-specific peroxiredoxin                                | 19274 | 5.0 | 0,45        | 0,19 |
| 6                             | gi 6323138    | Ahp1p        | Thiol-specific peroxiredoxin                                | 19274 | 5.0 | 0,29        | 0,01 |
| 7                             | gi 6323208    | Ylr179cp     | Protein of unknown function                                 | 22251 | 4.8 | 0,25        | 0,17 |
| 8                             | gi 6322707    | Mrp8p        | Putative mitochondrial ribosomal protein                    | 25082 | 4.7 | 0,28        | 0,05 |
| 9                             | gi 6322531    | Lia1p        | Deoxyhypusine hydroxylase                                   | 36313 | 4.8 | 0,35        | 0,14 |
| 10                            | gi 6323077    | Rps0bp       | Protein component of the small (40S) ribosomal subunit      | 28002 | 4.7 | 0,54        | 0,05 |
| 11                            | gi 6319698    | Pdb1p        | E1 beta subunit of the pyruvate dehydrogenase (PDH) complex | 40086 | 5.2 | 0,35        | 0,14 |

|    |             |          |                                                                                                                                                                                            |       |     |      |      |
|----|-------------|----------|--------------------------------------------------------------------------------------------------------------------------------------------------------------------------------------------|-------|-----|------|------|
| 12 | gi 6322565  | Ado1p    | Adenosine kinase                                                                                                                                                                           | 36520 | 4.9 | 0,39 | 0,07 |
| 13 | gi 6323221  | Hcr1p    | Dual function protein involved in translation initiation as a substoichiometric component of eukaryotic translation initiation factor 3 (eIF3) and required for processing of 20S pre-rRNA | 29546 | 5.0 | 0.30 | 0,05 |
| 14 | gi 6320899  | Hmf1p    | Member of the p14.5 protein family with similarity to Mmf1p                                                                                                                                | 14011 | 5.2 | 0,53 | 0,07 |
| 15 | gi 6324907  | Vma4p    | Subunit E of the eight-subunit V1 peripheral membrane domain of the vacuolar H <sup>+</sup> -ATPase (V-ATPase)                                                                             | 26455 | 5.3 | 0,39 | 0.02 |
| 16 | gi 14318474 | Sec53p   | Phosphomannomutase                                                                                                                                                                         | 29216 | 5.1 | 0,39 | 0,01 |
| 17 | gi 6324120  | Ssb2p    | Cytoplasmic ATPase that is a ribosome-associated molecular chaperone, functions with J-protein partner Zuo1p                                                                               | 66668 | 5.4 | 0,1  | 0,01 |
| 18 | gi 6325196  | Ald6p    | Cytosolic aldehyde dehydrogenase                                                                                                                                                           | 54414 | 5.2 | 0,56 | 0,06 |
| 19 | gi 6322564  | Sod1p    | Cytosolic superoxide dismutase                                                                                                                                                             | 15959 | 5.6 | 0,41 | 0,13 |
| 20 | gi 6324669  | Rki1p    | Ribose-5-phosphate ketol-isomerase                                                                                                                                                         | 28355 | 5.6 | 0,40 | 0,05 |
| 21 | gi 6319326  | Ade1p    | N-succinyl-5-aminoimidazole-4-carboxamide ribotide (SAICAR) synthetase                                                                                                                     | 34508 | 5.7 | 0,27 | 0.04 |
| 22 | gi 6321968  | Eno2p    | Enolase II                                                                                                                                                                                 | 46942 | 5.7 | 0,46 | 0,02 |
| 23 | gi 6321859  | Dys1p    | Deoxyhypusine synthase                                                                                                                                                                     | 43264 | 5.5 | 0,41 | 0,03 |
| 24 | gi 6320359  | Cpr1p    | Cytoplasmic peptidyl-prolyl cis-trans isomerase (cyclophilin)                                                                                                                              | 17494 | 6.9 | 0,41 | 0,01 |
| 27 | gi 6320079  | Ydl124wp | NADPH-dependent alpha-keto amide reductase                                                                                                                                                 | 35595 | 5.8 | 0,28 | 0,23 |
| 29 | gi 6320662  | Guk1p    | Guanylate kinase                                                                                                                                                                           | 20682 | 6.6 | 0,38 | 0,08 |

|                             |             |         |                                                                    |       |     |      |      |
|-----------------------------|-------------|---------|--------------------------------------------------------------------|-------|-----|------|------|
| 32                          | gi 6320359  | Cpr1p   | Cytoplasmic peptidyl-prolyl cis-trans isomerase (cyclophilin)      | 17494 | 6.9 | 0,47 | 0,06 |
| 33                          | gi 6324709  | ldh2p   | Subunit of mitochondrial NAD(+)-dependent isocitrate dehydrogenase | 39886 | 8.8 | 0,47 | 0.05 |
| 38                          | gi 6323087  | Shm2p   | Cytosolic serine hydroxymethyltransferase                          | 52471 | 7.0 | 0,54 | 0,11 |
| 39                          | gi 45719888 | Ura1p   | Dihydroorotate dehydrogenase                                       | 34950 | 5.8 | 0,39 | 0,42 |
| <b>Proteins upregulated</b> |             |         |                                                                    |       |     |      |      |
| 25                          | gi 6322468  | Tdh2p   | Glyceraldehyde-3-phosphate dehydrogenase                           | 35939 | 6.5 | 6,9  | 2,0  |
| 26                          | gi 6321631  | Tdh3p   | Glyceraldehyde-3-phosphate dehydrogenase                           | 35838 | 6.5 | 4,2  | 0,3  |
| 28                          | gi 6324486  | Adh1p   | Alcohol dehydrogenase                                              | 37282 | 6.2 | >10  |      |
| 30                          | gi 6321631  | Tdh3p   | Glyceraldehyde-3-phosphate dehydrogenase                           | 35838 | 6.5 | 3,6  | 2,1  |
| 31                          | gi 6322468  | Tdh2p   | Glyceraldehyde-3-phosphate dehydrogenase                           | 35939 | 6.5 | 2,8  | 0,1  |
| 34                          | gi 6321631  | Tdh3p   | Glyceraldehyde-3-phosphate dehydrogenase                           | 35838 | 6.5 | 3,2  | 1,3  |
| 35                          | gi 6321693  | Eno1p   | Enolase I                                                          | 46844 | 6.2 | 2,5  | 0,4  |
| 36                          | gi 6323886  | Rps10bp | Protein component of the small (40S) ribosomal subunit             | 12731 | 9.1 | >10  |      |
| 37                          | gi 10383781 | Pgk1p   | 3-phosphoglycerate kinase                                          | 44768 | 7.1 | 3,6  | 1,6  |
